# Supplementary material
Source: PubMed Central journal article supplement (PMC4319641)
Supplement: supp_the2014-0394_Supplemental_TableS1.pdf [file supp_the2014-0394_Supplemental_TableS1.pdf]

Supplemental Table for:  
Prognostic Factors of Survival in a Randomized Phase 3 Trial (MPACT) of Weekly nab-Paclitaxel Plus Gemcitabine vs Gemcitabine Alone in Patients With Metastatic Pancreatic Cancer  
Josep Taberero et al.

Table S1. Selected baseline characteristics.

| Variable                                        |                          | <i>nab</i> -P +<br>Gem<br>( <i>n</i> = 431) | Gem<br>( <i>n</i> = 430) | All<br>Patients<br>( <i>N</i> = 861) |
|-------------------------------------------------|--------------------------|---------------------------------------------|--------------------------|--------------------------------------|
| Age                                             | Median years (min, max)  | 62 (27, 86)                                 | 63 (32, 88)              | 63 (27, 88)                          |
|                                                 | ≥ 65 years, <i>n</i> (%) | 177 (41)                                    | 188 (44)                 | 365 (42)                             |
| Sex, <i>n</i> (%)                               | Male                     | 245 (57)                                    | 257 (60)                 | 502 (58)                             |
| Region, <i>n</i> (%)                            | North America            | 268 (62)                                    | 271 (63)                 | 539 (63)                             |
|                                                 | Australia                | 61 (14)                                     | 59 (14)                  | 120 (14)                             |
|                                                 | Eastern Europe           | 64 (15)                                     | 62 (14)                  | 126 (15)                             |
|                                                 | Western Europe           | 38 (9)                                      | 38 (9)                   | 76 (9)                               |
| KPS score, <i>n</i> (%)                         | 70                       | 30 (7)                                      | 33 (8)                   | 63 (7)                               |
|                                                 | 80                       | 149 (35)                                    | 128 (30)                 | 277 (32)                             |
|                                                 | 90                       | 179 (42)                                    | 199 (46)                 | 378 (44)                             |
|                                                 | 100                      | 69 (16)                                     | 69 (16)                  | 138 (16)                             |
|                                                 | 70–80                    | 179 (42)                                    | 161 (38)                 | 340 (40)                             |
|                                                 | 90–100                   | 248 (58)                                    | 268 (62)                 | 516 (60)                             |
| Pancreatic primary tumor location, <i>n</i> (%) | Head                     | 191 (44)                                    | 180 (42)                 | 371 (43)                             |
|                                                 | Body                     | 132 (31)                                    | 136 (32)                 | 268 (31)                             |
|                                                 | Tail                     | 105 (24)                                    | 110 (26)                 | 215 (25)                             |
| Number of metastatic sites, <i>n</i> (%)        | 1                        | 33 (8)                                      | 21 (5)                   | 54 (6)                               |
|                                                 | 2                        | 202 (47)                                    | 206 (48)                 | 408 (47)                             |
|                                                 | ≥ 3                      | 196 (45)                                    | 203 (47)                 | 399 (46)                             |
| CA19-9, <i>n</i> (%)                            | Normal                   | 60 (14)                                     | 56 (13)                  | 116 (13)                             |
|                                                 | > ULN but < 59 × ULN     | 122 (28)                                    | 120 (28)                 | 242 (28)                             |
|                                                 | ≥ 59 × ULN               | 197 (46)                                    | 195 (45)                 | 392 (46)                             |

CA19-9, carbohydrate antigen 19-9; Gem, gemcitabine; KPS, Karnofsky performance status; min, minimum; max, maximum; *nab*-P, *nab*-paclitaxel; ULN, upper limit of normal.
